# Supplementary material
Source: PubMed Central journal article supplement (PMC6573014)
Supplement: NIHMS1520584-supplement-1.pdf [file NIHMS1520584-supplement-1.pdf]

ONLINE SUPPLEMENT

**Blood Pressure Assessment in Adults in Clinical Practice and Clinic-Based Research:  
Report from a 2017 National Heart, Lung, and Blood Institute Working Group**

Paul Muntner, PhD,<sup>a</sup> Paula T. Einhorn, MD MS,<sup>b</sup> William C. Cushman, MD,<sup>c</sup> Paul K. Whelton, MB MD MSc,<sup>d</sup> Natalie A. Bello, MD MPH,<sup>e</sup> Paul E. Drawz, MD MHS MS,<sup>f</sup> Beverly B. Green MD MPH,<sup>g</sup> Daniel W. Jones, MD,<sup>h</sup> Stephen P. Juraschek, MD PhD,<sup>i</sup> Karen L. Margolis, MD MPH,<sup>j</sup> Edgar R. Miller 3<sup>rd</sup>, MD PhD,<sup>k</sup> Ann Marie Navar MD PhD,<sup>l</sup> Yechiam Ostchega, PhD RN,<sup>m</sup> Michael K. Rakotz, MD,<sup>n</sup> Bernard Rosner, PhD,<sup>o</sup> Joseph E. Schwartz, PhD,<sup>p</sup> Daichi Shimbo, MD,<sup>q</sup> George S. Stergiou, MD PhD,<sup>r</sup> Raymond R. Townsend, MD,<sup>s</sup> Jeff D. Williamson, MD,<sup>t</sup> Jackson T. Wright Jr., MD PhD,<sup>u</sup> Lawrence J. Appel, MD MPH,<sup>k</sup>

a. Department of Epidemiology, University of Alabama at Birmingham, Birmingham, AL.

b. Division of Cardiovascular Sciences, National Heart, Lung, and Blood Institute of the National Institutes of Health, Bethesda, MD.

c. Preventive Medicine Section, Medical Service, Veterans Affairs Medical Center, Memphis, TN.

d. Department of Epidemiology, Tulane University School of Public Health and Tropical Medicine, New Orleans, LA.

e. Department of Medicine, Division of Cardiology, Columbia University Medical Center New York, NY.

f. Division of Renal Diseases & Hypertension, University of Minnesota, Minneapolis, MN.

g. Kaiser Permanente Washington Health Research Institute, Seattle, WA.

h. Department of Medicine, University of Mississippi Medical Center, Jackson, MS.

i. Department of Medicine, Beth Israel Deaconess Medical Center, Harvard Medical School, Boston, MA.

j. HealthPartners Institute, Minneapolis, MN.

k. Department of Medicine, Johns Hopkins University, Baltimore, MD.

l. Duke Clinical Research Institute, Durham, NC.

m. National Center for Health Statistics of the Centers for Disease Control and Prevention, Hyattsville MD.

n. American Medical Association, Chicago IL.

o. Department of Medicine, Brigham's and Women's Hospital, Harvard University, Boston, MA.

p. Department of Psychiatry and Behavioral Sciences, Stony Brook University, Stony Brook, NY.

q. The Hypertension Center, Columbia University Medical Center, New York, NY.

r. Hypertension Center STRIDE-7, National and Kapodistrian University of Athens, School of Medicine, Third Department of Medicine, Sotiria Hospital, Athens, Greece.

s. Department of Medicine, University of Pennsylvania, Philadelphia, PA.

t. Department of Medicine, Wake Forest University, Winston-Salem, NC.

u. Department of Medicine, Case Western Reserve University, Cleveland, OH.

Correspondence:

Paul Muntner  
Department of Epidemiology

School of Public Health  
University of Alabama at Birmingham  
1700 University Boulevard, Suite 450  
Birmingham, AL 35294  
(205) 975-8077  
[pmuntner@uab.edu](mailto:pmuntner@uab.edu)  
@Muntnerpaul

The views expressed on this report are those of the authors and do not necessarily represent the views of the National Heart, Lung, and Blood Institute; the National Institutes of Health; or the Department of Health and Human Services. Dr. Rakotz is an employee of the American Medical Association. The findings and conclusions in this report are those of the author and do not necessarily represent the views of the American Medical Association.

Online Table 1. Standard errors of systolic and diastolic blood pressure based on one or two clinic visits and one, two or three blood pressure measurements per visit.

| Measurements<br>per visit | Systolic blood pressure, mm Hg |          | Diastolic blood pressure, mm Hg |          |
|---------------------------|--------------------------------|----------|---------------------------------|----------|
|                           | 1 visit                        | 2 visits | 1 visit                         | 2 visits |
| 1 per visit               | 7.0                            | 4.6      | 6.0                             | 4.0      |
| 2 per visit               | 6.4                            | 4.4      | 5.6                             | 3.9      |
| 3 per visit               | 6.3                            | 3.7      | 5.5                             | 3.2      |

Standard errors in this table are based on research-grade blood pressure measurements. Data from blood pressure measured in routine clinical practice may have larger standard errors.

(Personal communication: B. Rosner).
